# Supplementary material for: Predominance of sperm motion in corners
Source: PubMed Central journal article supplement (PMC4876399; doi:10.1038/srep26669), 2016-05-23
Supplement: srep26669-s1.pdf [file srep26669-s1.pdf]

**Supplementary Information file**

**Predominance of sperm motion in corners**

Reza Nosrati<sup>1</sup>, Percival J. Graham<sup>1</sup>, Qiaozhi Liu<sup>1</sup>, and David Sinton<sup>\*,1</sup>

<sup>1</sup> Department of Mechanical and Industrial Engineering, University of Toronto, Toronto, ON, M5S 3G8, Canada.

\* Corresponding author:

Prof. David Sinton

Department of Mechanical and Industrial Engineering, University of Toronto, 5 King's College Rd., Toronto, ON, Canada, M5S 3G8.

Phone: +1 (416) 978-1623.

E-mail: [sinton@mie.utoronto.ca](mailto:sinton@mie.utoronto.ca)

**Movie S1. Corner-swimming of sperm in 100  $\mu\text{m}$  square microchannels.** The scale bar represents 30  $\mu\text{m}$  and the video speed is 5x real-time.

**Movie S2. Wall-swimming of sperm in 250  $\mu\text{m}$  circular microchannels.** The scale bar represents 45  $\mu\text{m}$  and the video speed is 5x real-time.
